# Supplementary material for: Morphological, immunophenotypic, and genetic features of chronic lymphocytic leukemia with trisomy 12: a comprehensive review
Source: PubMed Central journal article supplement — Haematologica. 2018 May 10;103(6):931–8. doi: 10.3324/haematol.2017.186684 (PMC6058775; doi:10.3324/haematol.2017.186684), 2018-06
Supplement: 2017_186684-Disclosures_and_Contributions.pdf [file 2017_186684-Disclosures_and_Contributions.pdf]

Haematologica  
HAEMATOL/2017/186684  
Version 3

Morphologic, immunophenotypic, and genetic features of chronic  
lymphocytic leukemia with trisomy 12: a comprehensive review

Francesco Autore, Paolo Strati, Luca Laurenti, and Alessandra Ferrajoli

Disclosures: No disclosures

Contributions: Contributions is review of the literature and writing of the manuscript for all  
the authors
